# Supplementary material
Source: publisher figshare collection journal article supplement (https://acs.figshare.com/ndownloader/files/24910846)
Supplement: Supplementary file 1 [file 24910846]

# Artificial Nano-Targeted Cells (ANTC) with Stable Photothermal Performance for Multimodal Imaging-Guided Tumor-Specific Therapy

*Bin Qiao<sup>1#</sup>, Yuanli Luo<sup>1#</sup>, Hong-Bo Cheng<sup>2</sup>, Jianli Ren<sup>1</sup>, Jin Cao<sup>1</sup>, Chao Yang<sup>3</sup>, Bing Liang<sup>1</sup>, Anyu Yang<sup>1</sup>, Xun Yuan<sup>1</sup>, Jinrui Li<sup>1</sup>, Liming Deng<sup>1</sup>, Pan Li<sup>1</sup>, Hai-Tao Ran<sup>1</sup>, Lan Hao<sup>1</sup>, Zhiyi Zhou<sup>4</sup>, Maoping Li<sup>5</sup>, Yuanyuan Zhang<sup>6</sup>, Peter S. Timashev<sup>7</sup>, Xing-Jie Liang<sup>8,9\*</sup>, Zhigang Wang<sup>1\*</sup>*

1 Department of Ultrasound, Chongqing Key Laboratory of Ultrasound Molecular Imaging, the Second Affiliated Hospital of Chongqing Medical University, Chongqing 400010, P. R. China

2 State Key Laboratory of Organic-Inorganic Composites, Beijing Laboratory of Biomedical Materials, Beijing University of Chemical Technology, Beijing 100029, P. R. China

3 Department of Radiology, Chongqing General Hospital of Chinese Academy of Sciences Chongqing 400014, P. R. China

4 Department of General Medicine, Chongqing General Hospital of Chinese Academy of Sciences, Chongqing 400014, P. R. China

5 Department of Ultrasound, the First Affiliated Hospital of Chongqing Medical University, Chongqing 400010, P. R. China

6 Wake Forest Institute for Regenerative Medicine, Wake Forest University School of Medicine, Winston-Salem, North Carolina 27101-4135, USA.

7 Institute for Regenerative Medicine, Sechenov University, Moscow 119991, Russia

8 CAS Key Laboratory for Biomedical Effects of Nanomaterials and Nanosafety, CAS Center for Excellence in Nanoscience, National Center for Nanoscience and Technology of China, Beijing 100190, P. R. China

9 University of Chinese Academy of Sciences, Beijing 100049, P. R. China.

<sup>#</sup>These authors contributed equally to this work.

\*To whom correspondence may be addressed: wzg62942443@163.com (Zhigang Wang),  
liangxj@nanoctr.cn (Xing-Jie Liang)

## ***Contents***

***Part A. Experimental Section. -----Page 3.***

***Part B. Supplementary Figures. ----- Page 5.***

***Part C. Supplementary Tables. -----Page22.***

## A: Experimental Section.

*Photothermal Conversion Efficiency of MPFTNPs:* According to the method reported by Roper's team, the  $\eta$  of MPFTNPs was calculated.<sup>1-2</sup> Briefly, 200  $\mu\text{L}$  of MPFTNPs suspension was added to 96-well plates and irradiation was performed with an 808 nm laser at an intensity of  $2.0 \text{ W cm}^{-2}$ . Then, the laser was turned off after the temperature reached a steady state. The heating and cooling process was recorded using an infrared thermal imaging camera. The  $\eta$  of MPFTNPs was calculated according to the following formulas:

$$(1) \eta = \frac{hS\Delta T_{\text{Max}} - Q_s}{I(1 - 10^{-A_\lambda})}$$

$$(2) \tau_s = \frac{\sum m_i C_{pi}}{hS}$$

In formula 1,  $\eta$  represents the conversion efficiency value,  $\Delta T_{\text{max}}$  is the maximum equilibrium temperature minus the minimum equilibrium temperature,  $Q_s$  is the light absorbance of distilled water,  $I$  is the laser energy (mW) for the 808 nm laser, and  $A_\lambda$  is related to the absorbance value of the MPFTNP suspension tested by analysis of the UV-Vis spectrum at 808 nm. The value of  $hS$  was calculated based on formula 2.

In formula 2,  $m$  represents the mass of water (200 mg), and  $C$  represents the specific heat capacity ( $4.2 \text{ J g}^{-1} \text{ K}^{-1}$ ). The time constant ( $\tau_s$ ) was calculated from the linear time-dependent data collected in the cooling period (Figure 2H) and determined to be 213.3 s. According to the formula (2), the  $hS$  was calculated to be  $3.938 \times 10^{-3} \text{ W K}^{-1}$ .

Finally, the  $\eta$  of MPFTNPs was calculated based on formula 1. The  $\Delta T_{\text{max}}$  value of MPFTNPs was  $33.0^\circ\text{C}$  under pH 4.5, the  $\Delta T_{\text{max}}$  value of PFTNPs was  $20.4^\circ\text{C}$  under pH 4.5,  $Q_s$  was measured to be 1.68 mW, and  $I$  was determined to be 0.64 mW.  $A_\lambda$  was determined to be 0.49 as tested by UV-Vis spectroscopy at 808 nm. The  $\eta$  of MPFTNPs (pH 4.5) under 808 nm laser irradiation was calculated to be 30.02%. The  $\eta$  of PFTNPs (pH 4.5) under 808 nm laser irradiation was calculated to be 18.56%.

*Calculation of Combination index (CI) of PDT and PTT:* The CI is calculated by the following Equation:

$$CI = \frac{D_{A|A+B}}{D_A} + \frac{D_{B|A+B}}{D_B} = 0.703$$

In the above equation,  $D_{A|A+B}$  and  $D_{B|A+B}$  are the IC<sub>50</sub> doses (the half-maximal inhibitory concentration) for PDT and PTT in combined therapy, respectively.  $D_A$  is the IC<sub>50</sub> dose for PDT and  $D_B$  is the IC<sub>50</sub> dose for PTT against MDA-MB-231 cells. The CI value reflects the interaction effect between PDT and PTT.  $CI < 0.6$  indicates strong synergism;  $0.6 < CI < 0.8$  indicates moderate synergism;  $0.8 < CI < 0.9$  indicates slight synergism; while  $0.9 < CI < 1.1$  indicates an additive effect according to the previous report.<sup>3-4</sup>

***B: Supplementary figures***

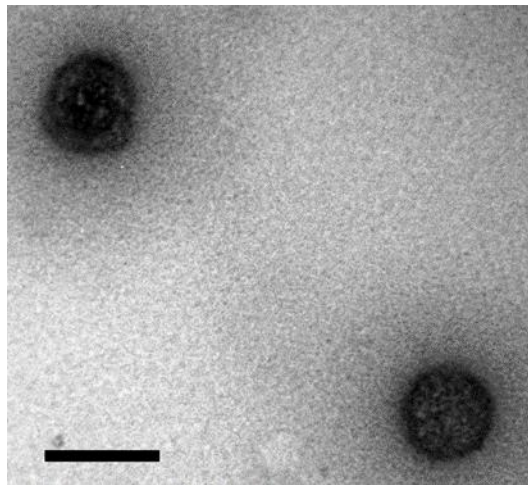

**Figure S1.** TEM image of PFTNPs. The scale bar is 200 nm.

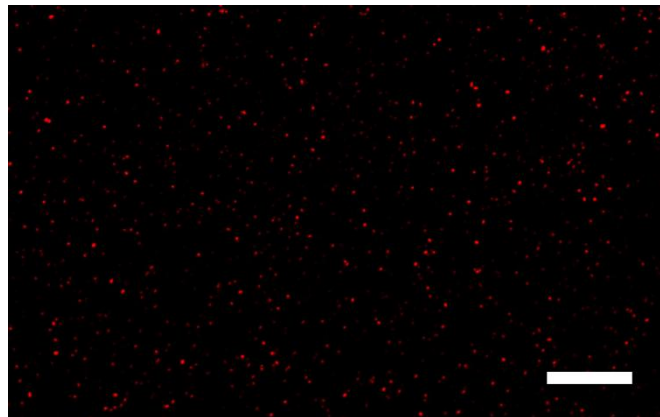

**Figure S2.** CLSM image of MPFTNPs ( $\lambda_{\text{excitation}}/\lambda_{\text{emission}} = 635 \text{ nm}/680 \text{ nm}.$ ). The scale bar is 20  $\mu\text{m}$ .

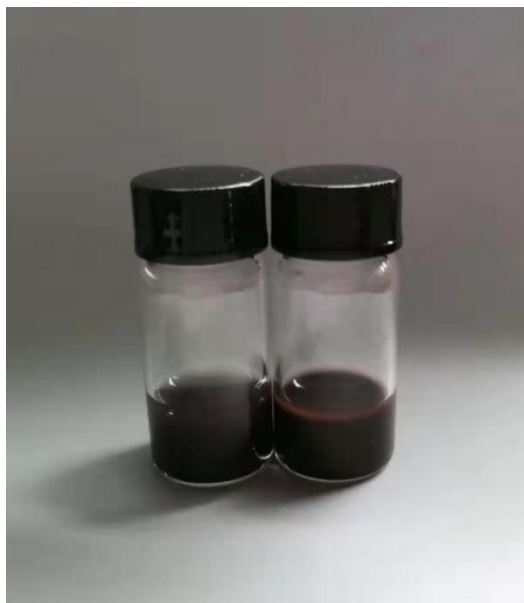

**Figure S3.** Digital images of PFTNPs (left) and MPFTNPs (right).

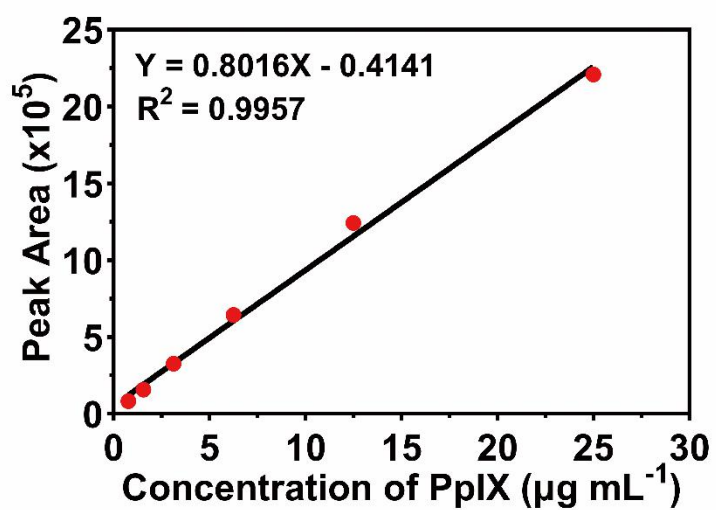

**Figure S4.** Standard curve of PpIX based on high-performance liquid chromatography (HPLC).

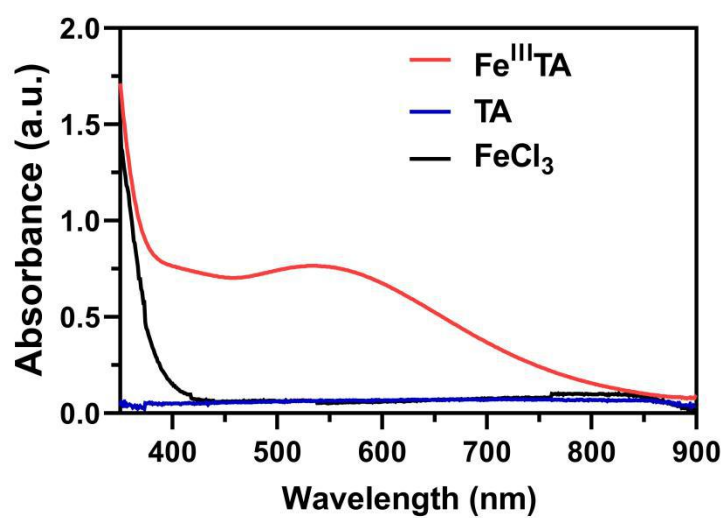

**Figure S5.** The UV-vis spectrum of TA, FeCl<sub>3</sub>, and Fe<sup>III</sup>TA.

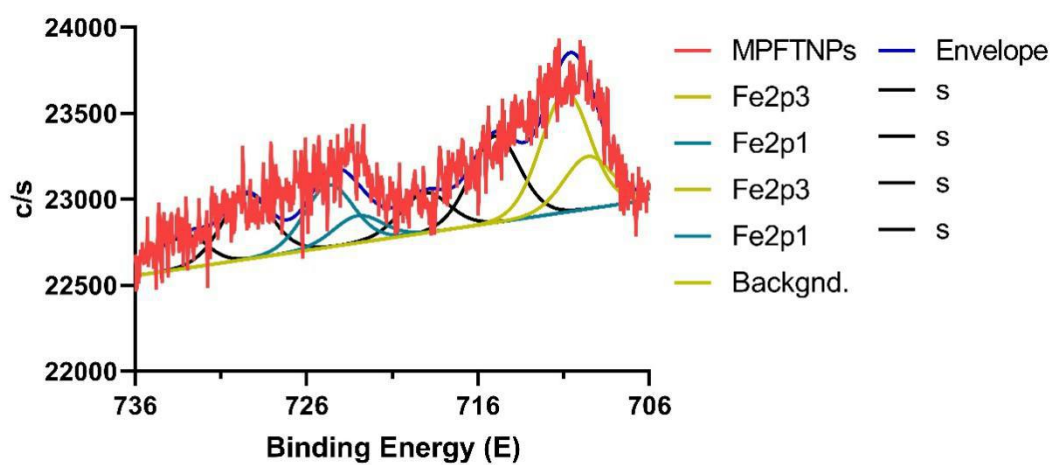

**Figure S6.** XPS high-resolution Fe2p spectra of MPFTNPs.

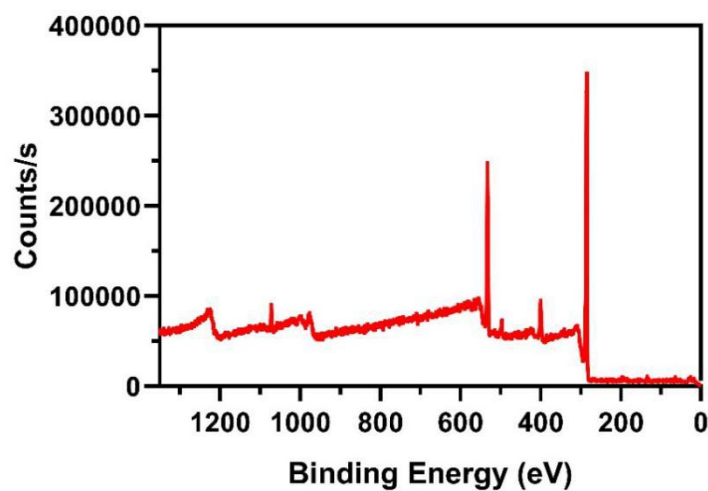

**Figure S7.** XPS spectra of MPFTNPs.

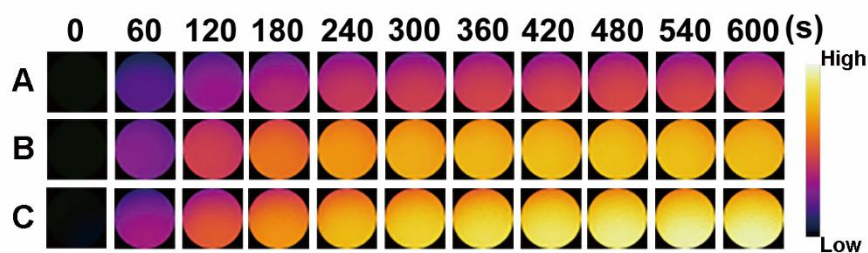

**Figure S8.** Infrared thermal images of PFTNPs under 808 nm laser irradiation with different pH values at a power density of  $2.0 \text{ W cm}^{-2}$  (A: pH 4.5; B: pH 5.5; C: pH 7.0).

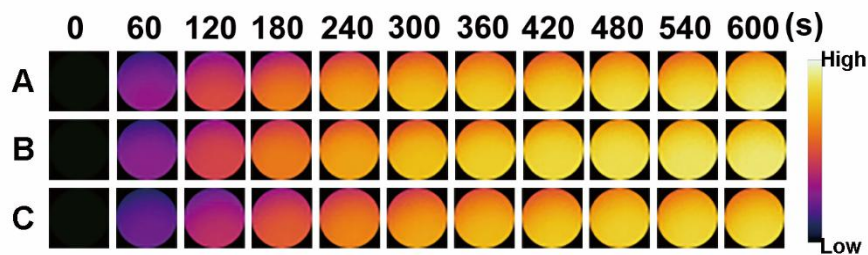

**Figure S9.** Infrared thermal images of MPFTNPs under 808 nm laser irradiation with different pH values at a power density of  $2.0 \text{ W cm}^{-2}$  (A: pH 7.0; B: pH 5.5; C: pH 4.5).



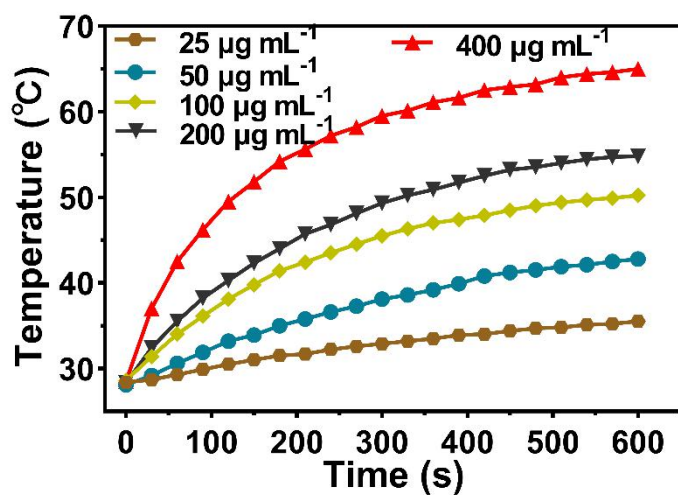

**Figure S10.** Photothermal curves of MPFTNPs at various concentrations.

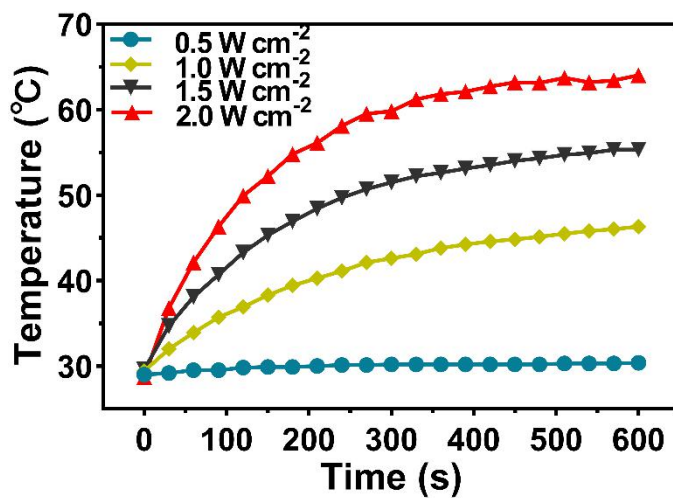

**Figure S11.** Photothermal curves of MPFTNPs at different laser power densities.

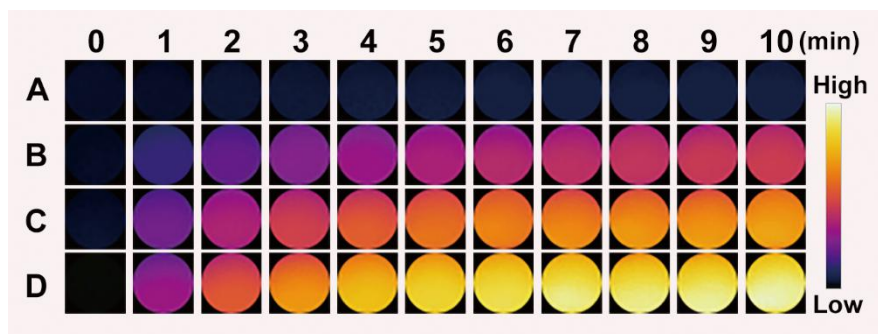

**Figure S12.** Infrared thermal images under irradiation with different laser power densities (A: 0.5 W cm<sup>-2</sup>, B: 1.0 W cm<sup>-2</sup>, C: 1.5 W cm<sup>-2</sup>, D: 2.0 W cm<sup>-2</sup>).

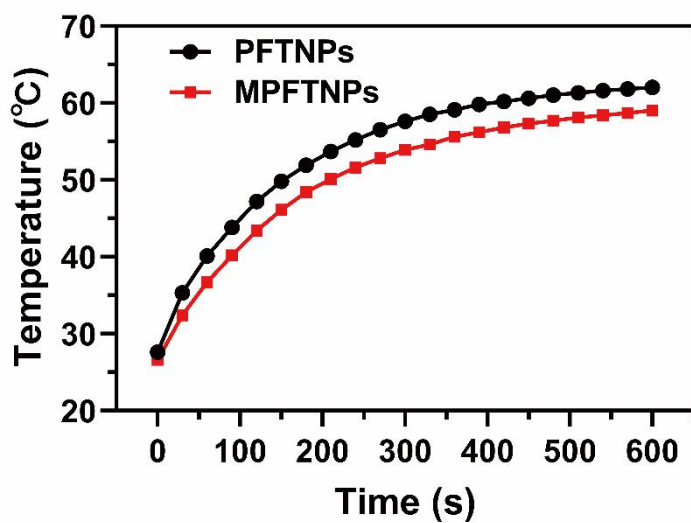

**Figure S13.** Photothermal performance of MPFTNPs and PFTNPs under 808 nm laser irradiation for 10 min.

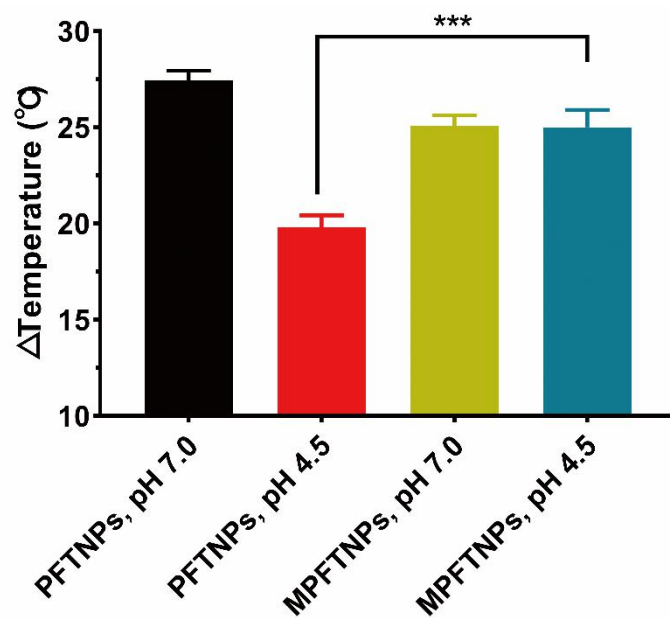

**Figure S14.** Temperature change in PFTNPs and MPFTNPs at 8 h of incubation under different pH.

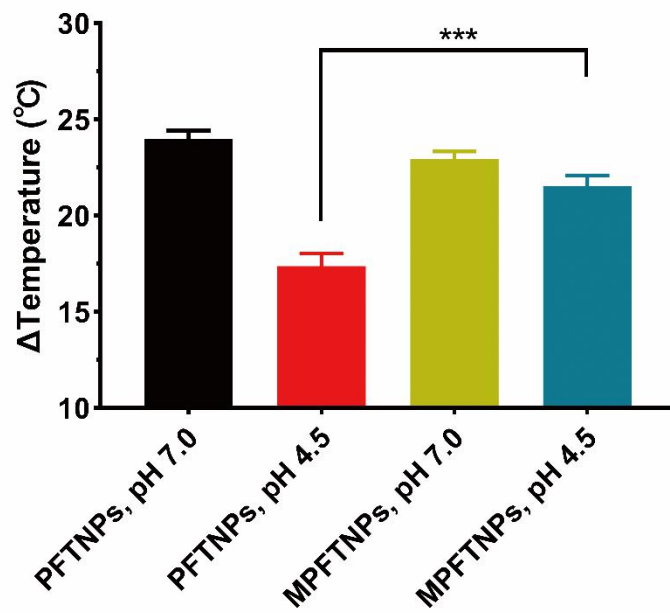

**Figure S15.** Temperature change in PFTNPs and MPFTNPs at 24 h of incubation under different pH.

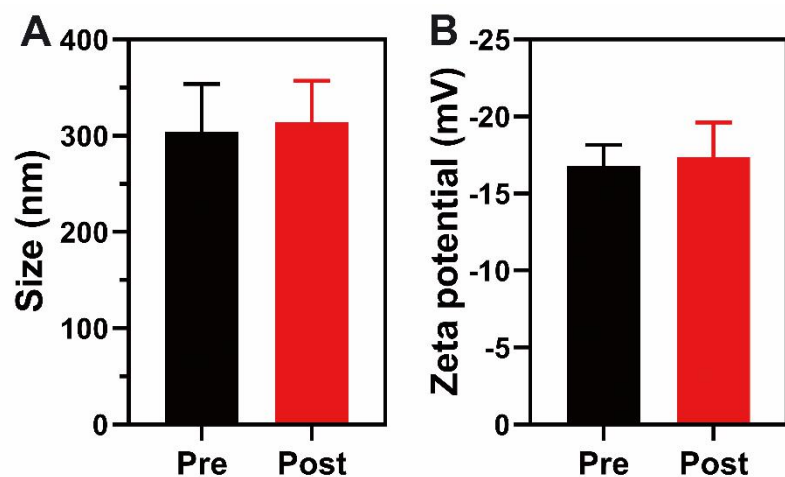

**Figure S16.** (A) Size and (B) Zeta potential change after 5 cycles of PTT.

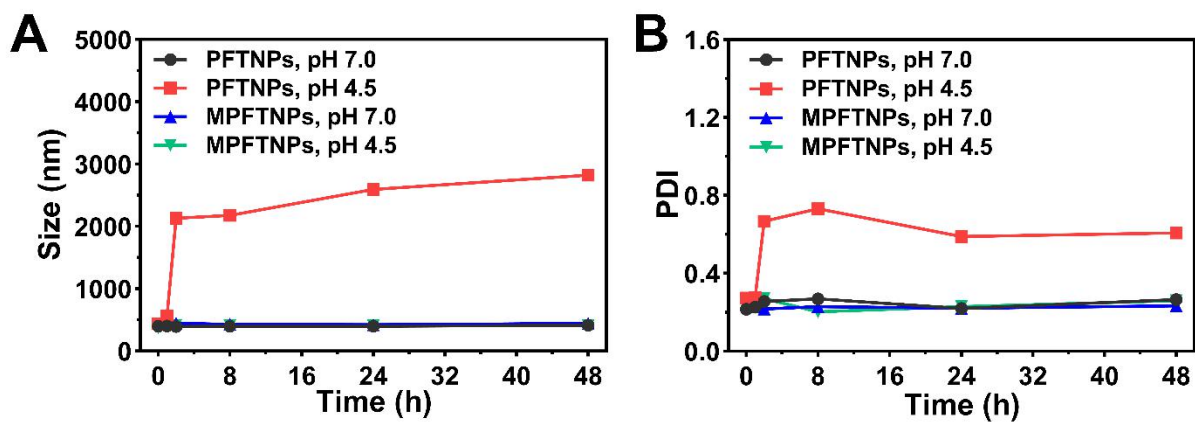

**Figure S17.** (A) The Size and (B) PDI change of PFTNPs and MPFTNPs in pH 4.5 or pH 7.0 after incubation.

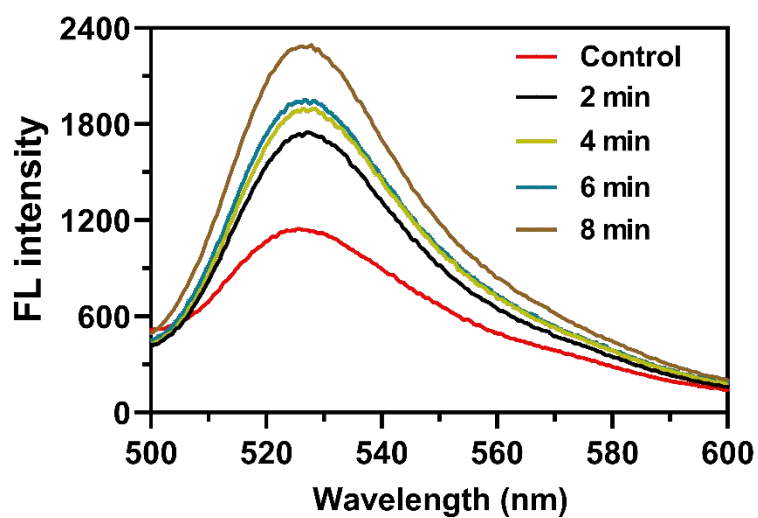

**Figure S18.** SOSG fluorescence intensity of MPFTNPs. Time-dependent ROS production of MPFTNPs as irradiated by 660 nm laser ( $0.1 \text{ W cm}^{-2}$ ). The concentration of PpIX was  $15 \mu\text{g mL}^{-1}$ .

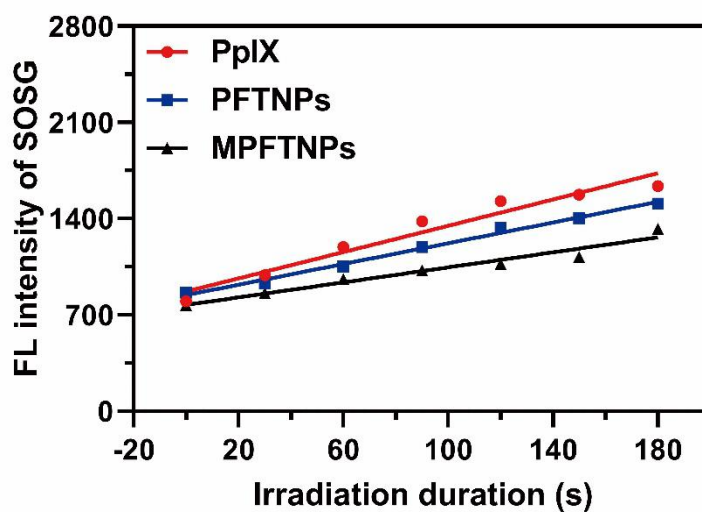

**Figure S19.** ROS production in solutions as determined by SOSG. The concentration of PpIX was  $10 \mu\text{g mL}^{-1}$ .

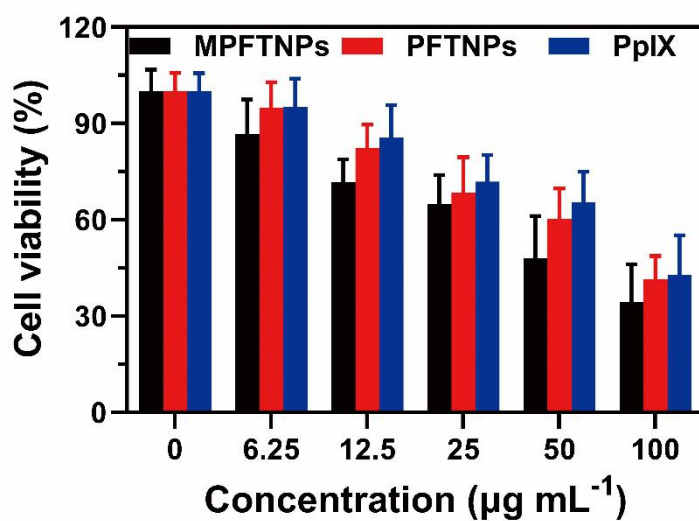

**Figure S20.** Cell viability of MDA-MB-231 cells treated with MPFTNPs, PFTNPs, and PpIX with 660 nm laser irradiation ( $100 \text{ mW cm}^{-2}$ , 3 min).

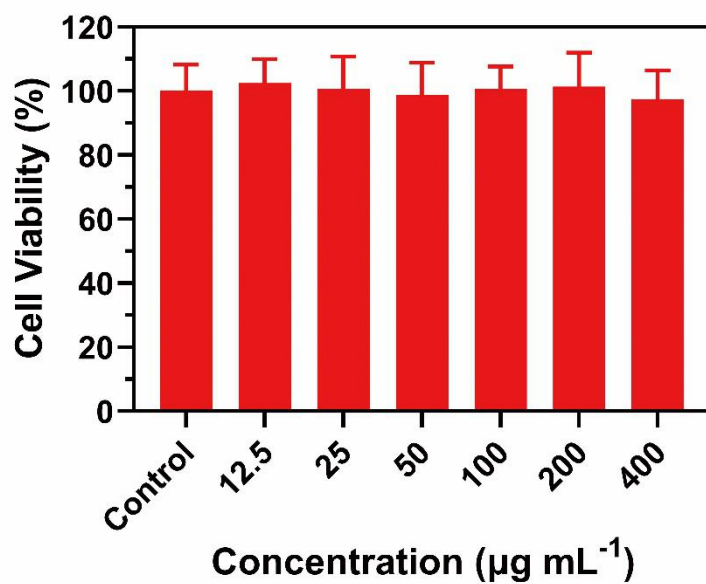

**Figure S21.** Viability of MDA-MB-231 cells after coincubation with various concentrations of the cancer cell membrane.

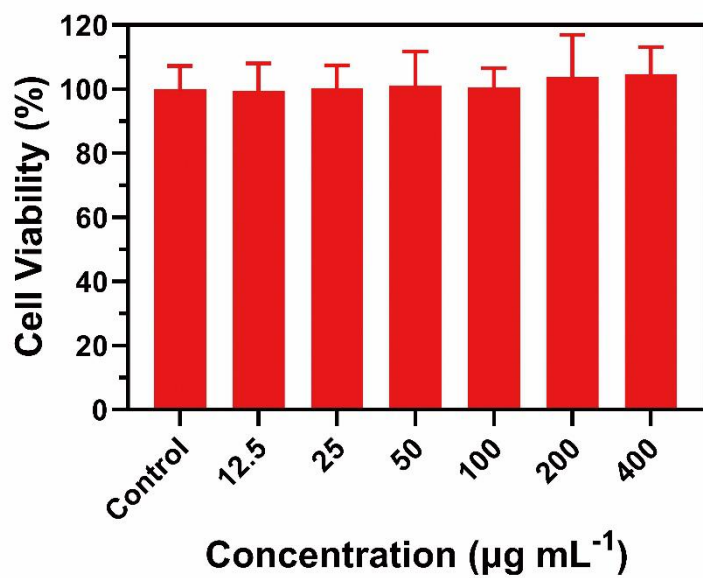

**Figure S22.** Viability of MDA-MB-231 cells after coincubation with various concentrations of  $\text{Fe}^{\text{III}}\text{TA}$ .

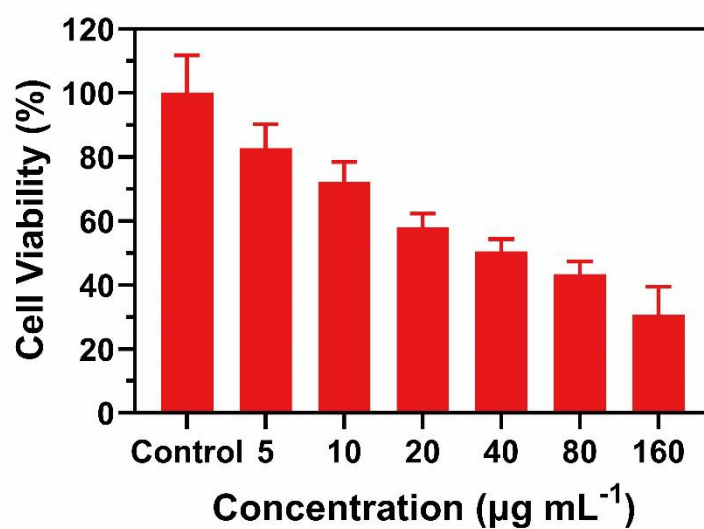

**Figure S23.** Viability of MDA-MB-231 cells after coincubation with various concentrations of free PpIX.

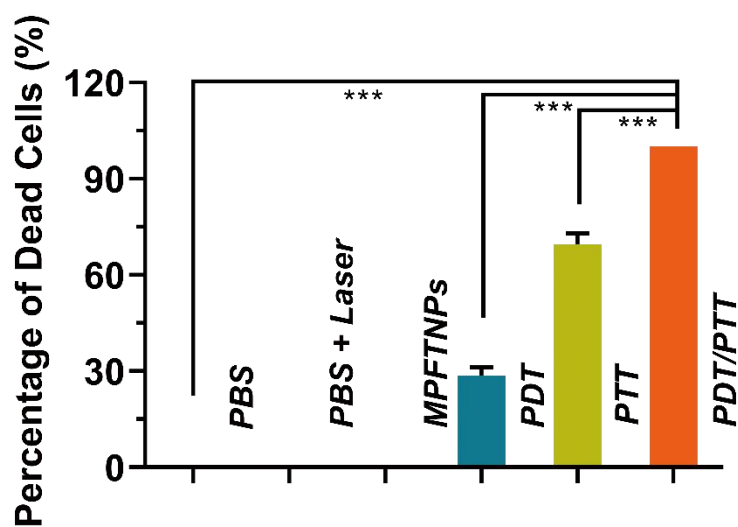

**Figure S24.** Quantitative analysis of MDA-MB-231 cells costained with calcein AM (living cells, green) and propidium iodide (dead cells, red) after various treatments according to CLSM.



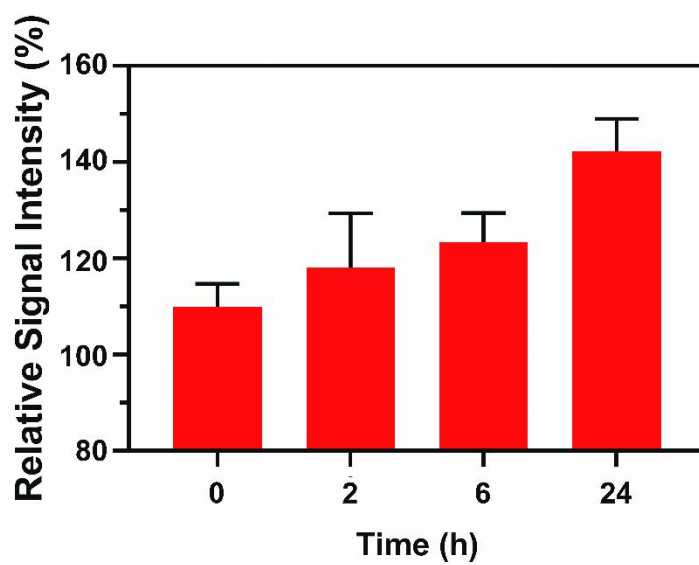

**Figure S25.** Quantitative analysis of MRI signals at the tumor site relative to liver tissue.

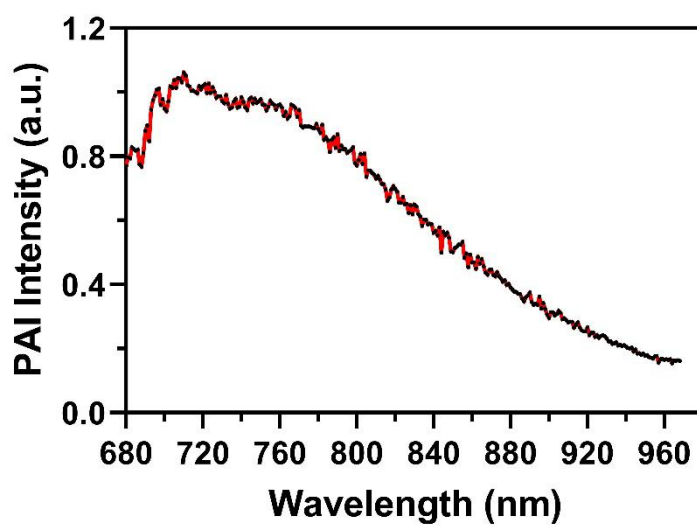

**Figure S26.** PAI intensity under full-spectrum scanning (ranging from 680 to 968 nm).

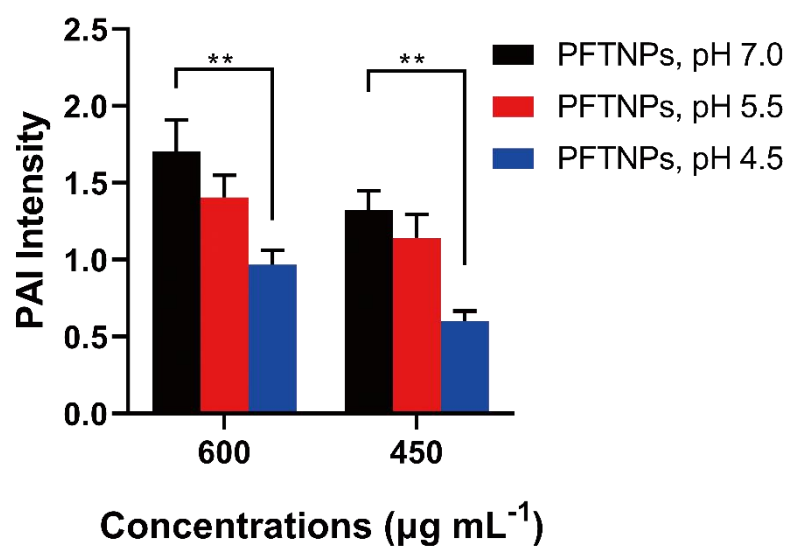

**Figure S27.** PAI intensity values of PFTNPs under different pH.

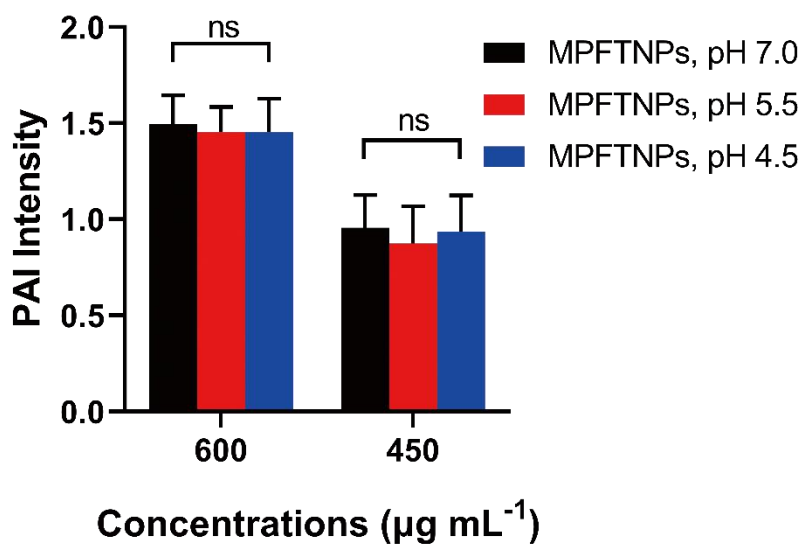

**Figure S28.** PAI intensity values of MPFTNPs under different pH.

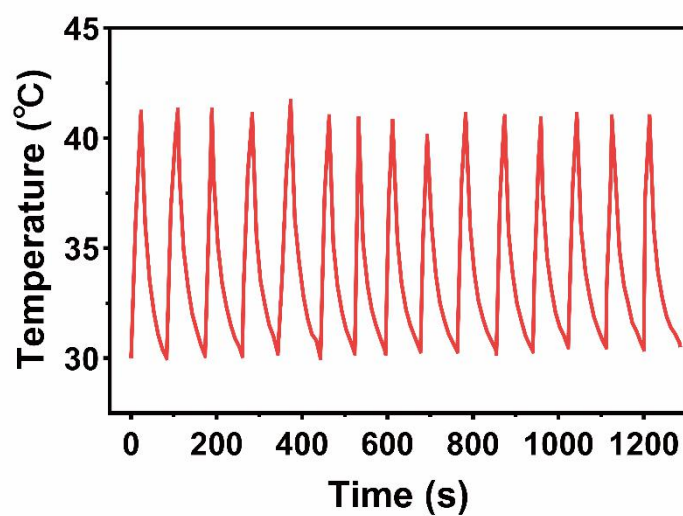

**Figure S29.** Temperature changes during the PDT process *in vivo*.

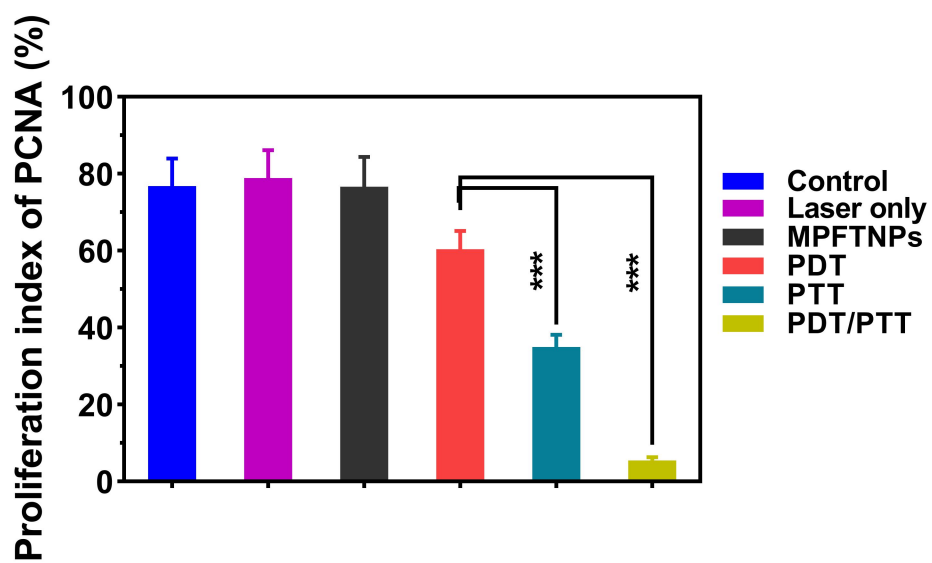

**Figure S30.** Quantitative analysis of the proliferation index in different groups.

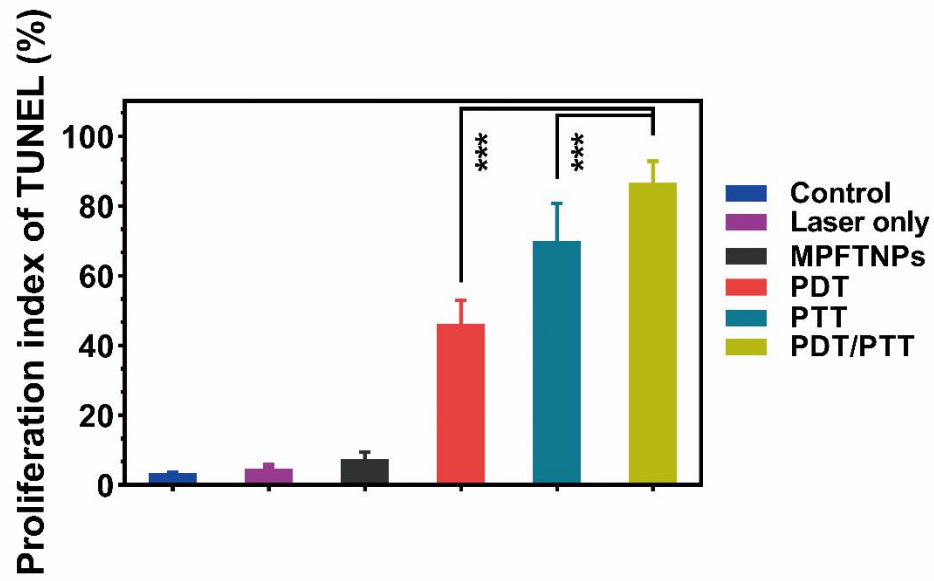

**Figure S31.** Quantitative analysis of the apoptotic index in different groups.

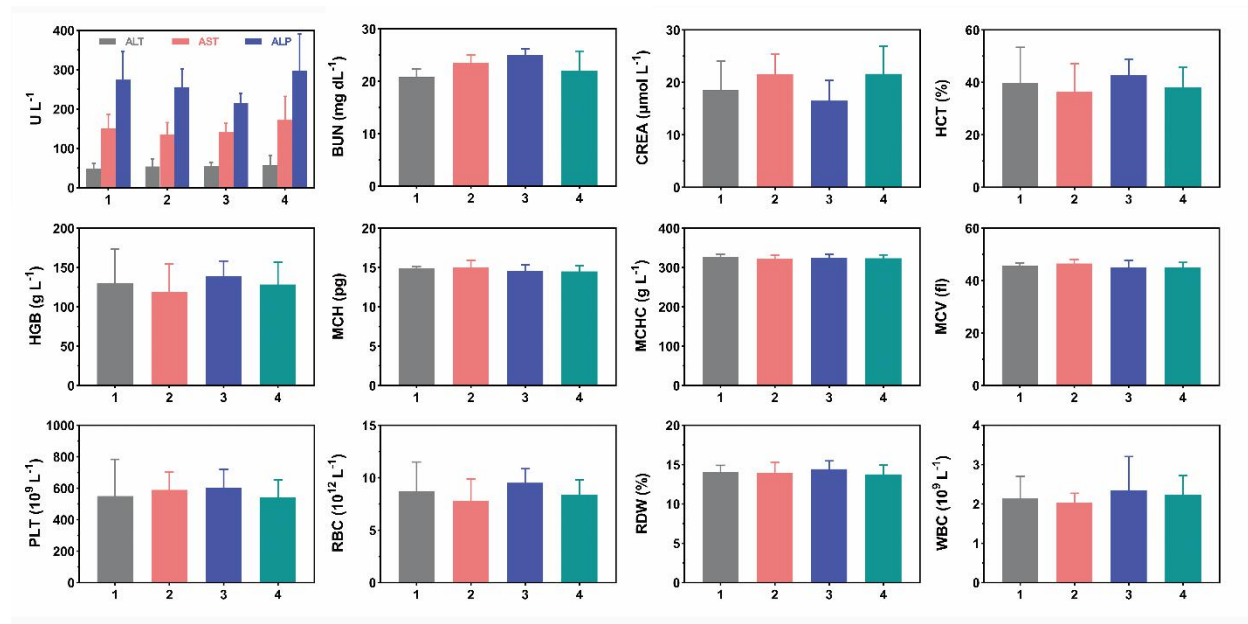

**Figure S32.** Hematological assays of mice sacrificed 30 d post injection of MPFTNPs at different concentrations (group 1: 0 mg mL<sup>-1</sup>, group 2: 10 mg mL<sup>-1</sup>, group 3: 20 mg mL<sup>-1</sup>, and group 4: 40 mg mL<sup>-1</sup>). There was no significant difference between the groups.

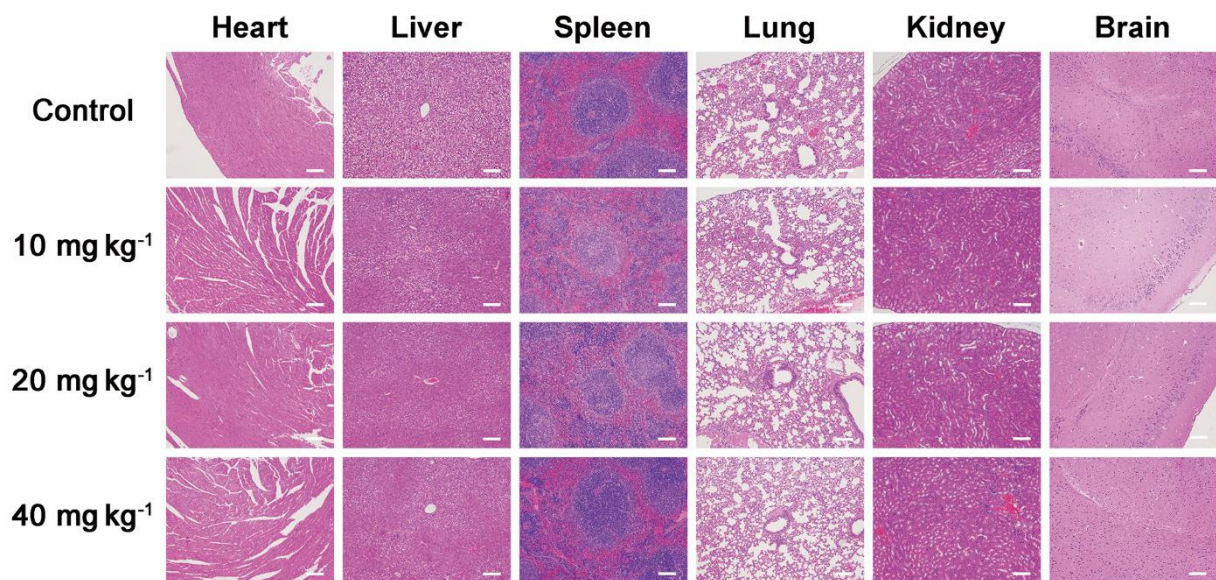

**Figure S33.** Hematoxylin & eosin (H&E) staining of the heart, liver, spleen, lungs, kidneys, and brain in mice sacrificed 30 d post injection of MPFTNPs at different concentrations (0, 10, 20, and 40 mg mL<sup>-1</sup>). The scale bar is 100  $\mu$ m.

### ***C. Supplementary Tables.***

|        | PFTNPs | MPFTNPs |
|--------|--------|---------|
| pH 7.0 | 32.39% | 31.93%  |
| pH 5.5 | 23.38% | 31.11%  |
| pH 4.5 | 18.56% | 30.02%  |

***Table S1.*** Photothermal conversion efficiency of MPFTNPs and PFTNPs under different pH.

### ***References:***

1. Feng, W.; Han, X.; Wang, R.; Gao, X.; Hu, P.; Yue, W.; Chen, Y.; Shi, J., Nanocatalysts-Augmented and Photothermal-Enhanced Tumor-Specific Sequential Nanocatalytic Therapy in Both NIR-I and NIR-II Biowindows. *Adv. Mater.* **2019**, *31*, e1805919.
2. Liu, T.; Zhang, M.; Liu, W.; Zeng, X.; Song, X.; Yang, X.; Zhang, X.; Feng, J., Metal Ion/Tannic Acid Assembly as a Versatile Photothermal Platform in Engineering Multimodal Nanotheranostics for Advanced Applications. *ACS Nano* **2018**, *12*, 3917-3927.
3. Cheng, L.; Zhang, F.; Wang, S.; Pan, X.; Han, S.; Liu, S.; Ma, J.; Wang, H.; Shen, H.; Liu, H.; Yuan, Q., Activation of Prodrugs by NIR-Triggered Release of Exogenous Enzymes for Locoregional Chemo-Photothermal Therapy. *Angew. Chem. Int. Ed. Engl.* **2019**, *58*, 7728-7732.
4. Barua, S.; Mitragotri, S., Synergistic Targeting of Cell Membrane, Cytoplasm, and Nucleus of Cancer Cells Using Rod-Shaped Nanoparticles. *ACS Nano* **2013**, *7*, 9558-9570.
